# Supplementary material for: Mucor thermorhizoides—A New Species from Post-mining Site in Sudety Mountains (Poland)
Source: PubMed Central journal article supplement (PMC11144139; doi:10.1007/s00284-024-03708-7), 2024-06-01
Supplement: 284_2024_3708_MOESM1_ESM.pdf [file 284_2024_3708_MOESM1_ESM.pdf]

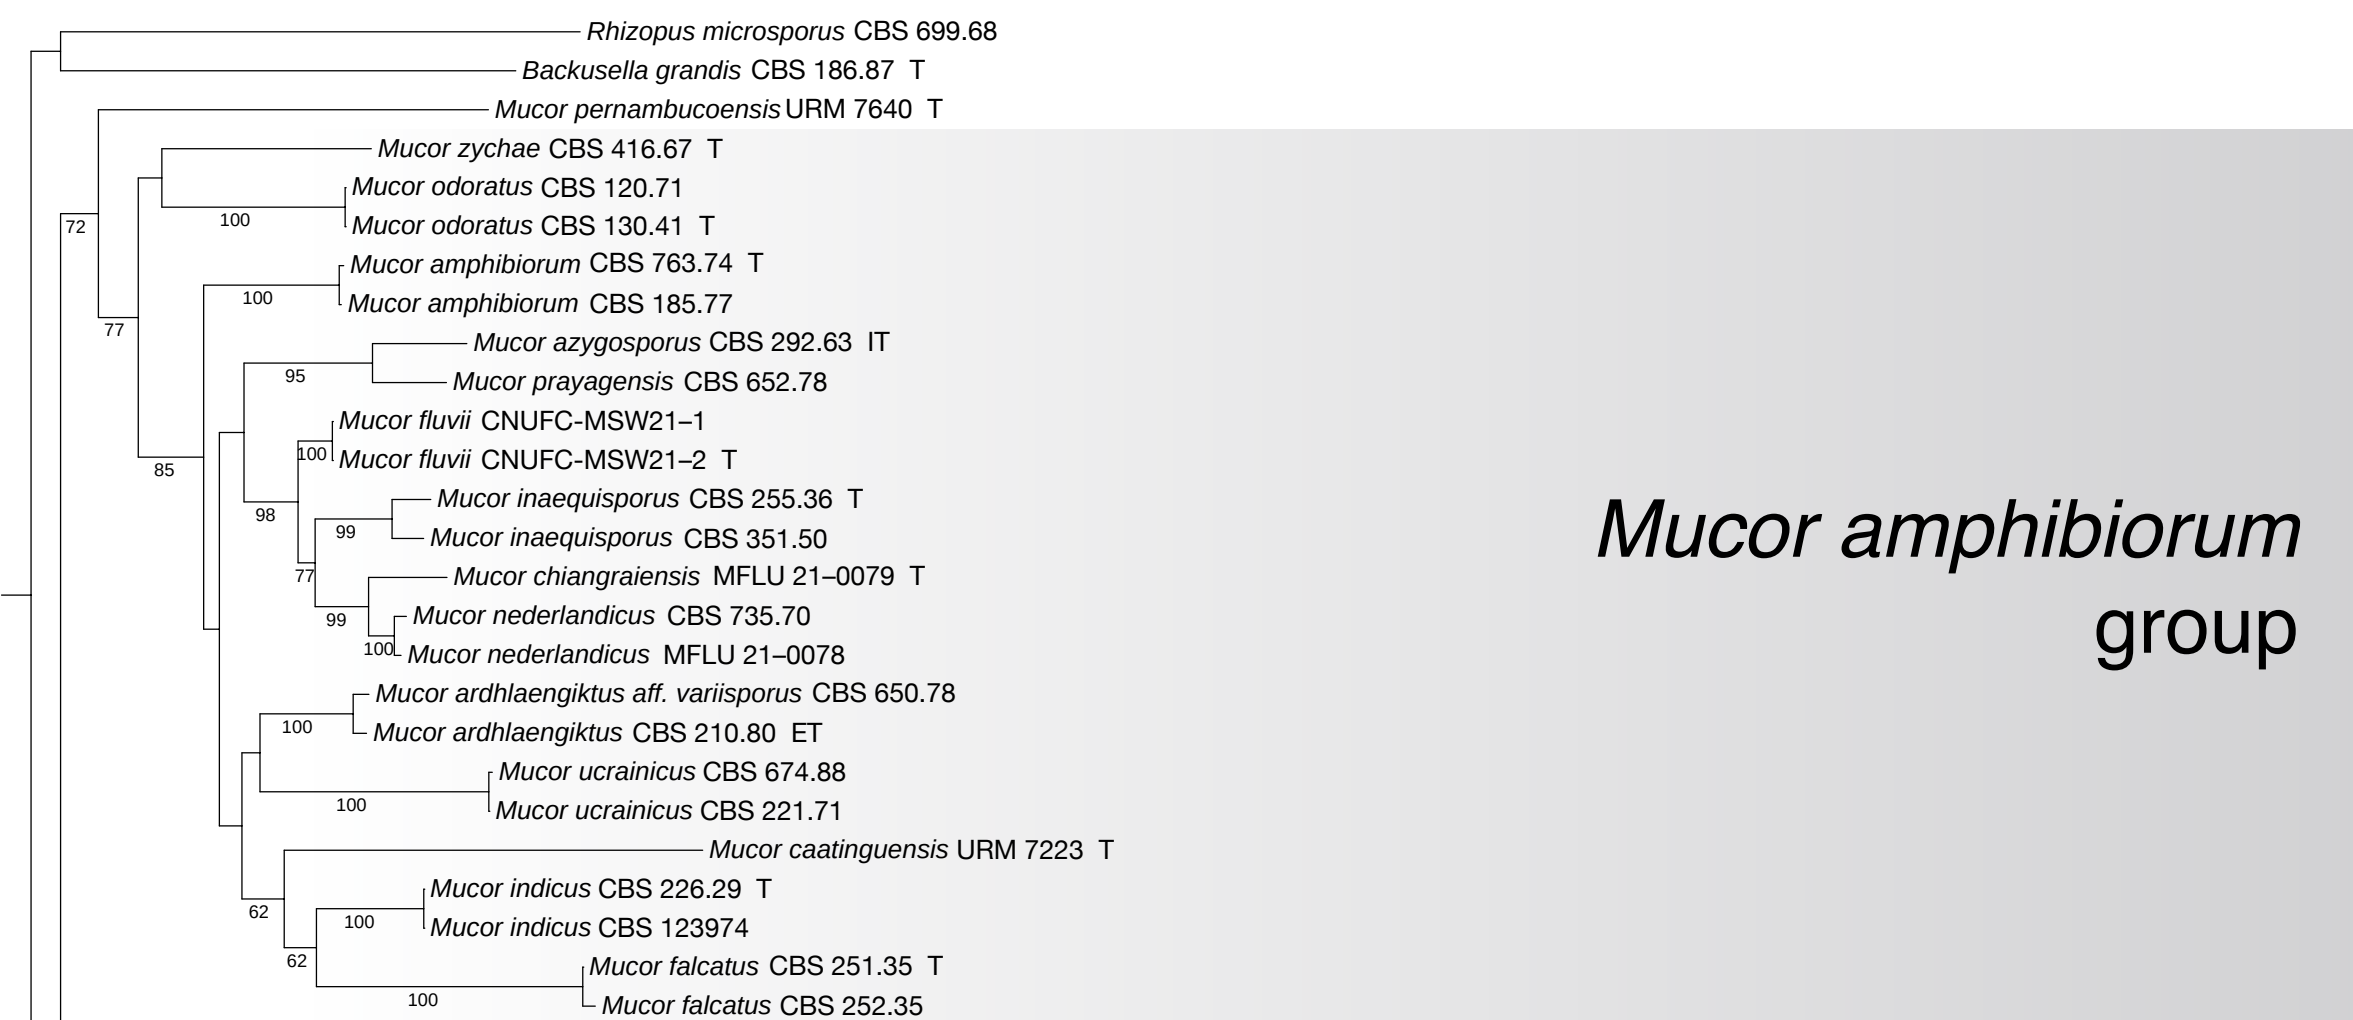

*Mucor amphibiorum*  
group

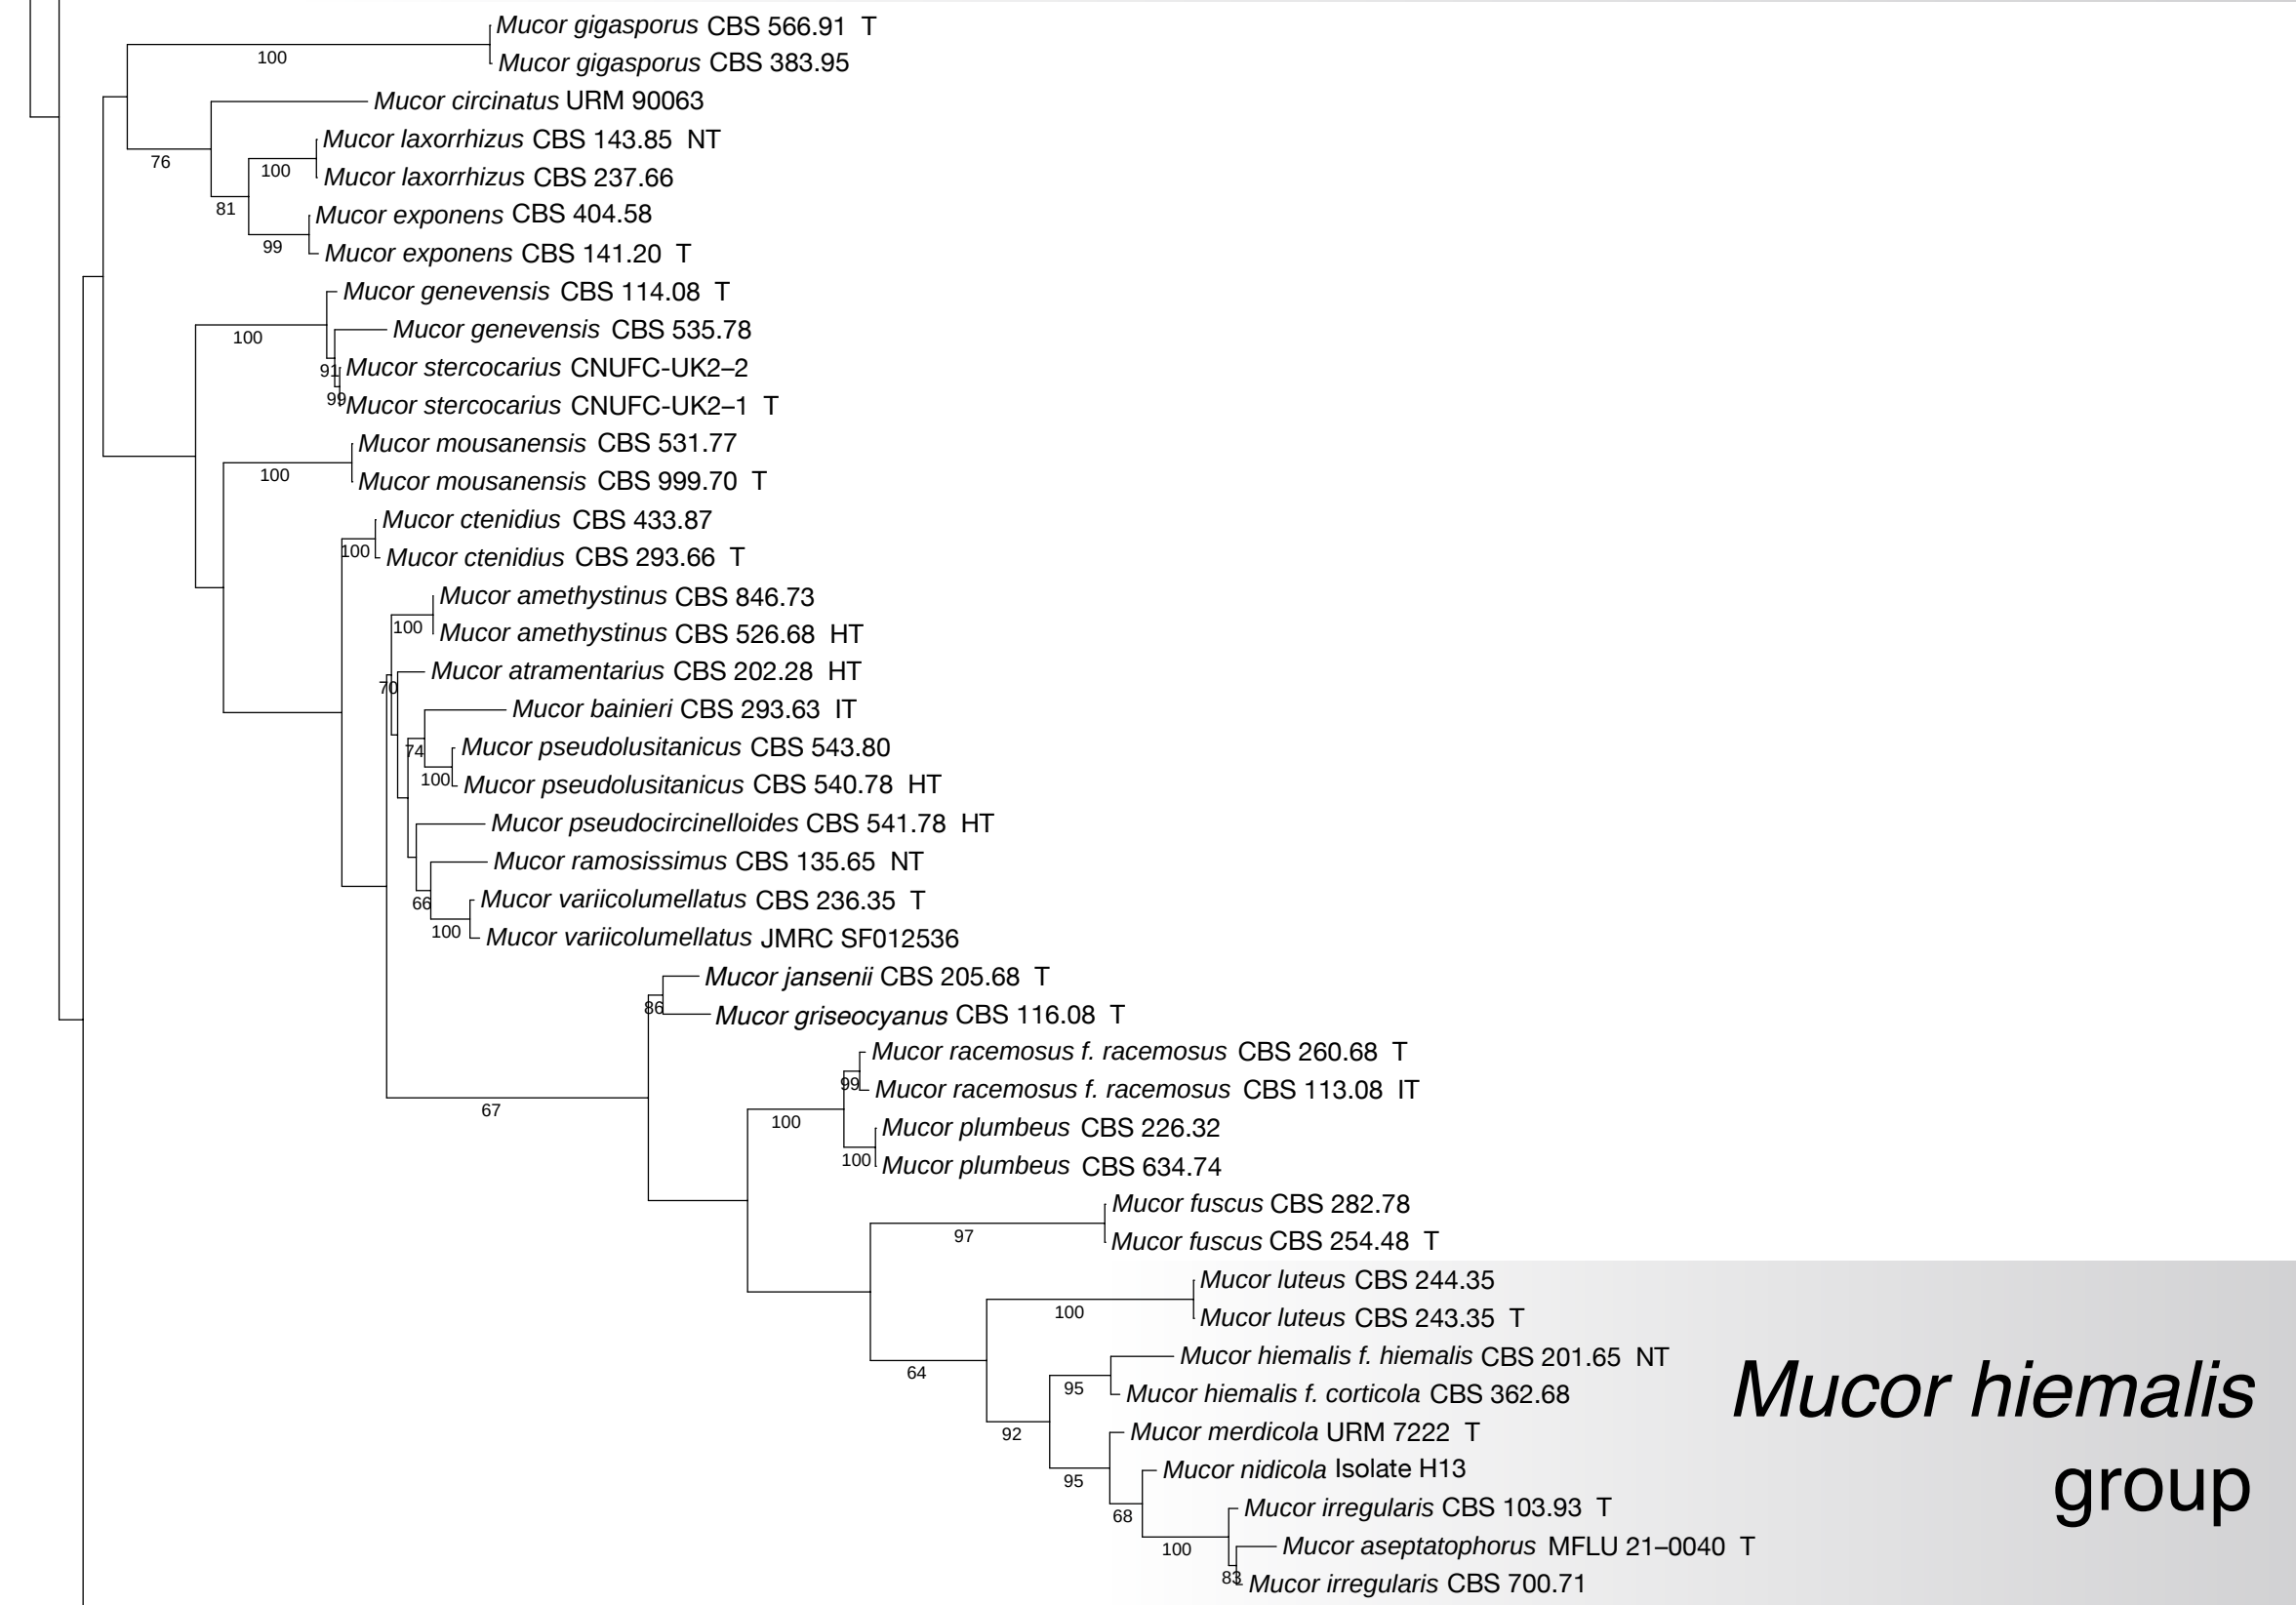

*Mucor hiemalis*  
group

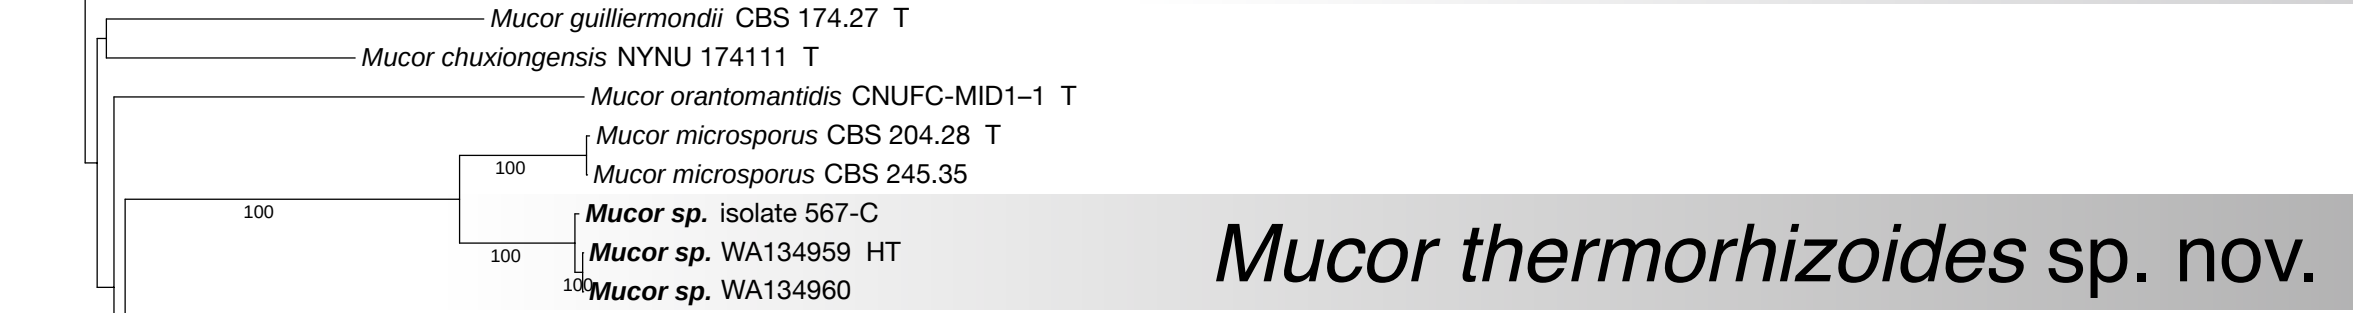

*Mucor thermorhizoides* sp. nov.

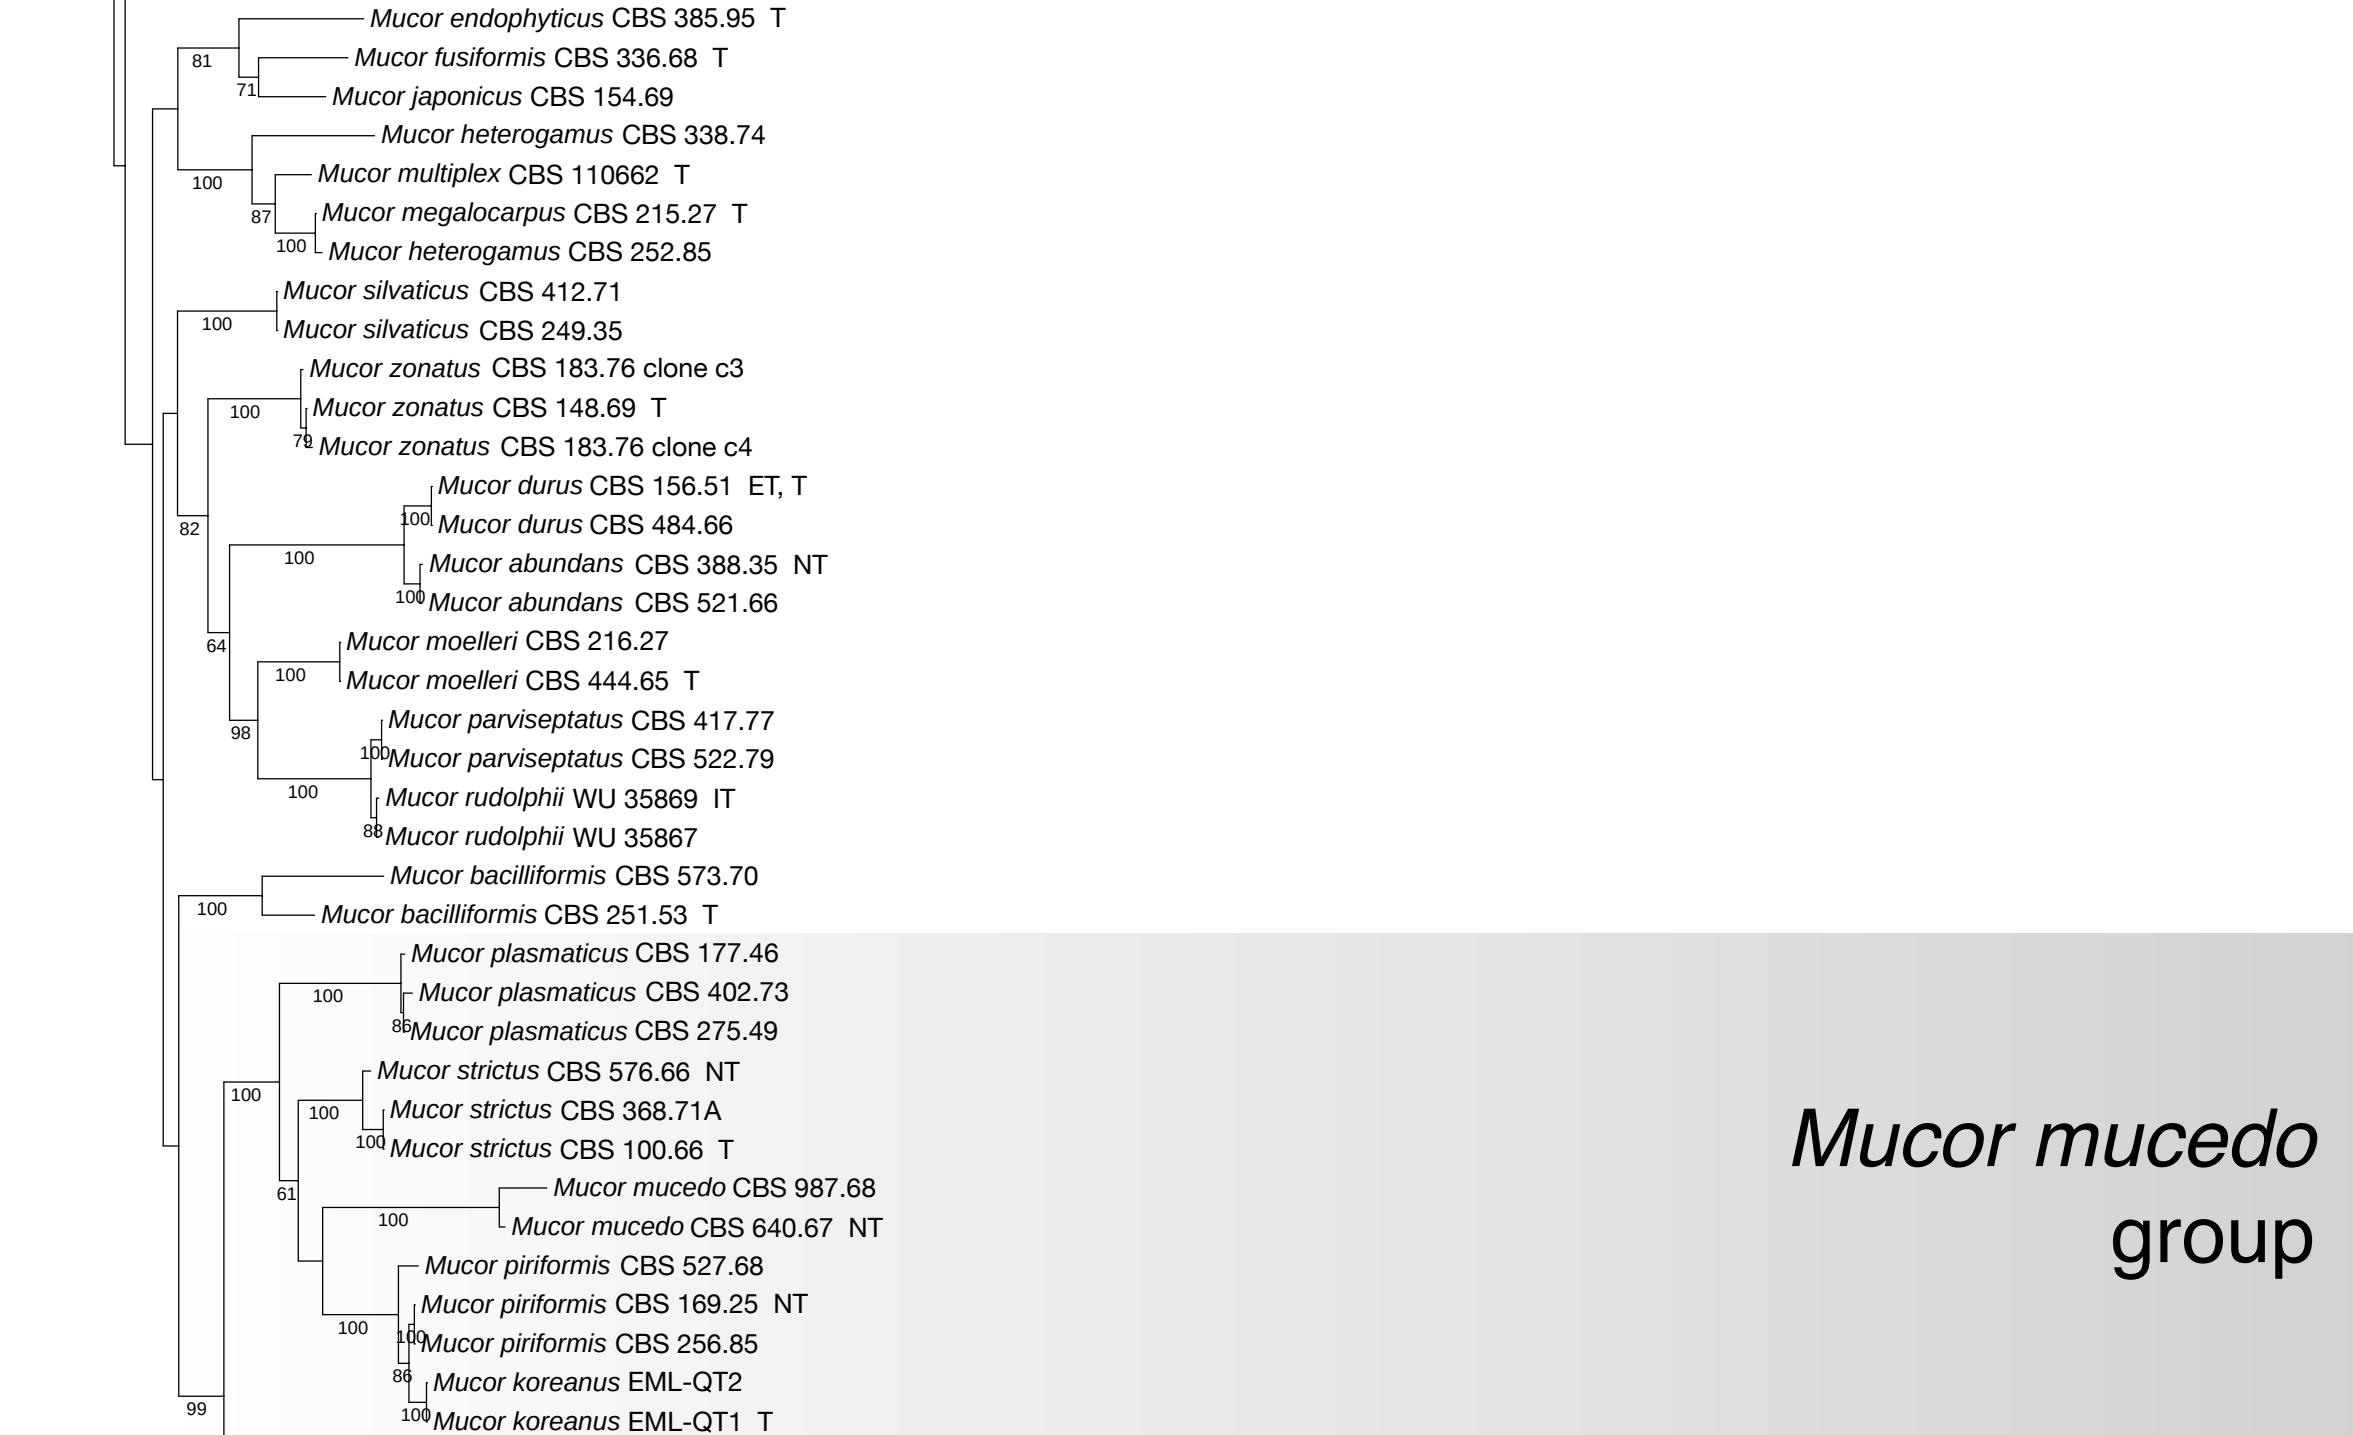

*Mucor mucedo*  
group

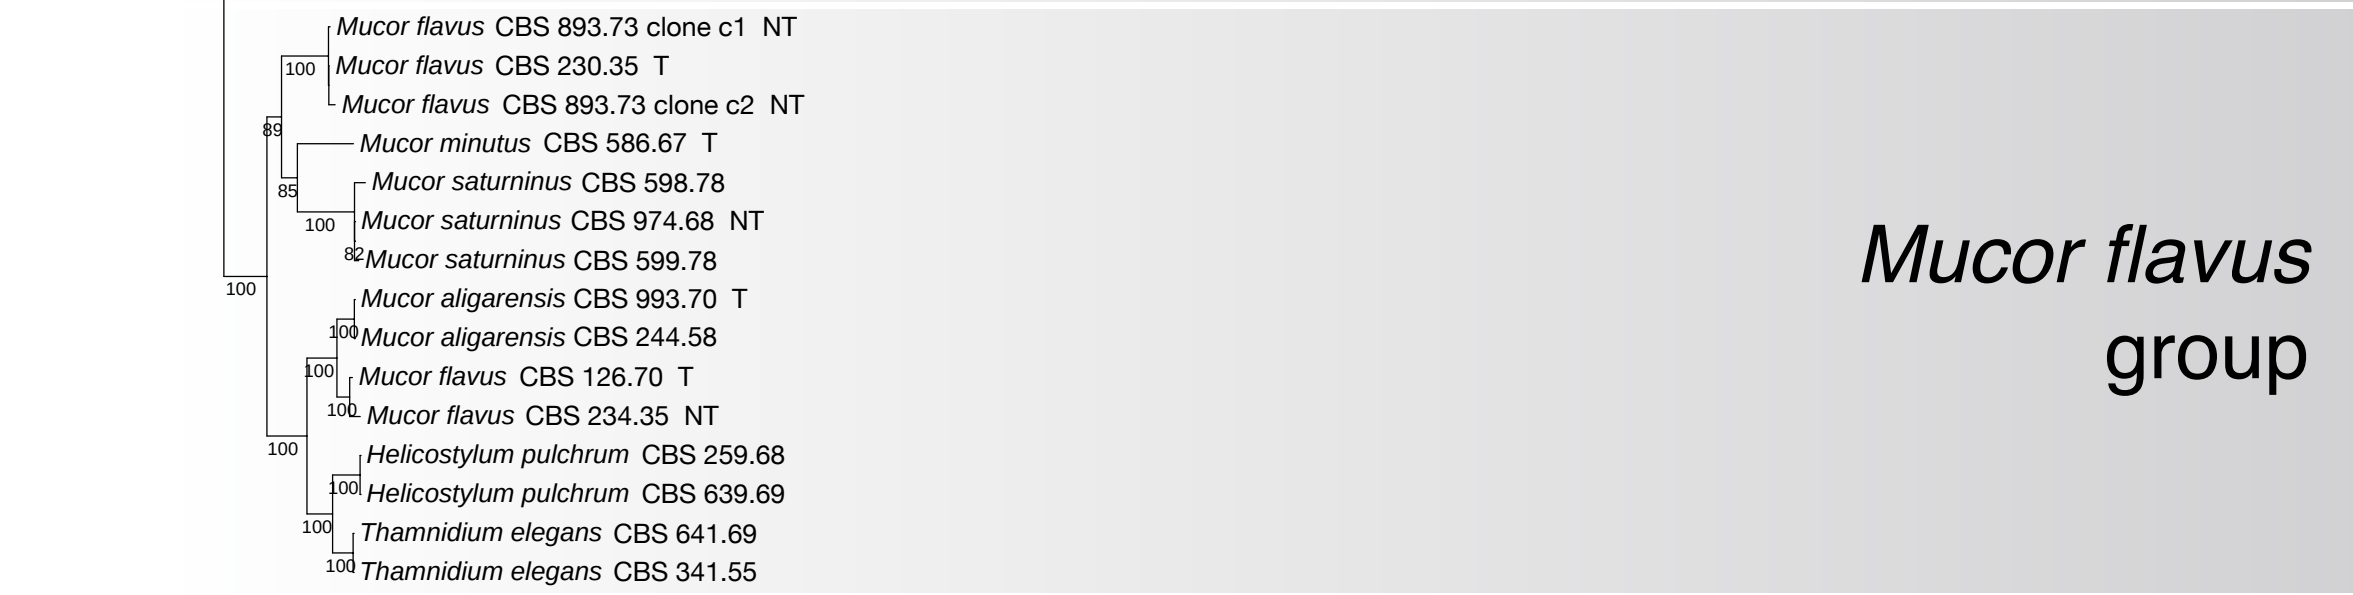

*Mucor flavus*  
group
